# Supplementary material for: Disrupting KATP channels diminishes the estrogen-mediated protection in female mutant mice during ischemia-reperfusion
Source: PubMed Central journal article supplement (PMC4047774; doi:10.1186/1559-0275-11-19), 2014-05-06
Supplement: 1559-0275-11-19-S1.pdf [file 1559-0275-11-19-S1.pdf]

**A**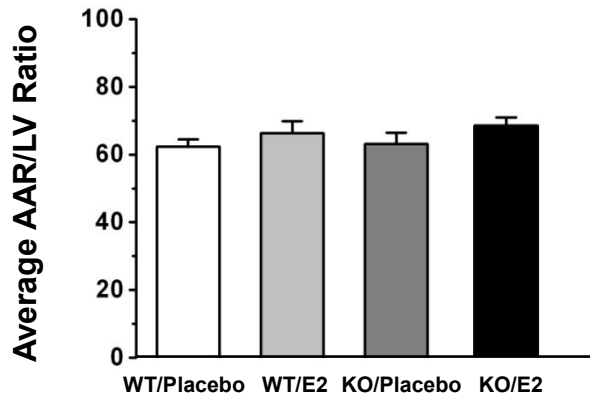**B**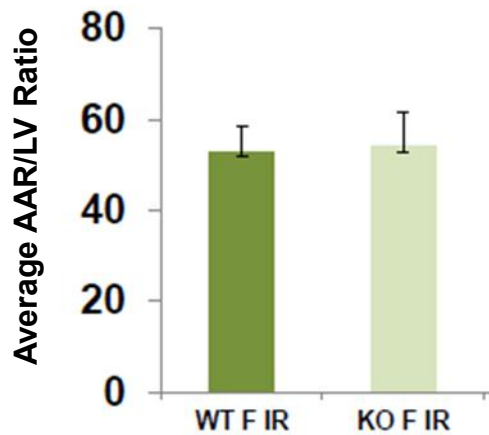

**Figure S1.** (A) Average area-at-risk over left ventricular region ratios recorded in SUR2KO and WT hearts post I-R. Treated mice had similar area-at-risk over LV ratios post I-R, n=6-8. (B) Ovariectomized mice implanted with either estrogen (E2) or placebo pellets displayed comparable area-at-risk over LV ratios after I-R treatment. n=4-5. This is a control parameter that shows our consistency in surgical handling.
